# Supplementary material for: Expression of Mesenchymal Stem Cells-Related Genes and Plasticity of Aspirated Follicular Cells Obtained from Infertile Women
Source: Hindawi journal article supplement (doi:10.1155/2014/508216), 2014-01-01
Supplement: f1 [file 508216.f1.pdf]

## Supplementary Data

**Table 1:** Functional grouped list of genes used for gene expression analysis in aspirated follicular cells obtained from follicular aspirates (MSCs = mesenchymal stem cells).

| <b>FUNCTIONAL GENE GROUPING</b>        | <b>GENE NAMES</b>                                                                                                                                                                                     |
|----------------------------------------|-------------------------------------------------------------------------------------------------------------------------------------------------------------------------------------------------------|
| <b>Stemness (pluripotency) markers</b> | <i>FGF2, INS, LIF, OCT4, REX1, SOX2, TERT, WNT3A</i>                                                                                                                                                  |
| <b>MSCs-specific markers</b>           | <i>BMP2, CASP3, CD105, CD106, CD13, CD133, CD146, CD15, CD166, CD271, CD340, CD349, CD44, CD49f, CD51, CD73, CD90, KDR, PDGFRB</i>                                                                    |
| <b>Associated with MSCs</b>            | <i>ANXA5, BDNF, BGLAP, BMP7, CD29, CD45, CD54, COL1A1, CSF2, CSF3, CTNNB1, EGF, FUT1, GTF3A, HGF, IFNG, IGF1, IL10, IL1B, IL6, KITLG, MMP2, NES, NUDT6, PIGS, SLC17A5, TGFB3, TNF, VEGF, VIM, VWF</i> |
| <b>Osteogenesis</b>                    | <i>BMP2, BMP6, FGF10, HDAC1, HNF1A, KDR, MITF, PTK2, RUNX2, SMURF1, SMURF2, TBX2</i>                                                                                                                  |
| <b>Adipogenesis</b>                    | <i>PPARG, RHOA, RUNX2</i>                                                                                                                                                                             |
| <b>Chondrogenesis</b>                  | <i>ABCB1, BMP2, BMP4, BMP6, CD11c, GDF5, GDF6, GDF7, HAT1, PCAF, SOX9, TGFB1</i>                                                                                                                      |
| <b>Myogenesis</b>                      | <i>ACTA2, JAG1, NOTCH1</i>                                                                                                                                                                            |
| <b>Tenogenesis</b>                     | <i>BMP2, GDF15, SMAD4, TGFB1</i>                                                                                                                                                                      |
